# Supplementary material for: Haplotype-aware modeling of cis-regulatory effects highlights the gaps remaining in eQTL data
Source: PubMed Central journal article supplement (PMC10789818; doi:10.1038/s41467-024-44710-8), 2024-01-15
Supplement: 41467_2024_44710_MOESM3_ESM.pdf [file 41467_2024_44710_MOESM3_ESM.pdf]

## **Description of Additional Supplementary Files**

File Name: Supplementary Data 1

Description: Tissue abbreviations used in the manuscript.

File Name: Supplementary Data 2

Description: The percentage of genes with an excess allelic imbalance after accounting for known eQTLs for each GTEx individual shown in Fig.4A.

File Name: Supplementary Data 3

Description: Sample size and median number of genes among samples analyzed in Fig.4B.

File Name: Supplementary Data 4

Description: The percentage of genes with an excess allelic imbalance by self-reported ancestry after accounting for known eQTLs for each GTEx individual shown in Fig.5A.

File Name: Supplementary Data 5

Description: Sample size and median number of genes among samples analyzed in Fig.5B.

File Name: Supplementary Data 6

Description: Sample size and median number of genes among samples analyzed in Fig.5C.
